# Supplementary material for: The Use of Highly Diverse Clades As A Surrogate For Habitat Integrity Analysis: A Practical Tool For Rapid Assessments
Source: Research Square preprint supplement (doi:10.21203/rs.3.rs-595312/v1), 2021-07-23
Supplement: Supplementary file 1 [file b7b59b211a071b4e18043871.xlsx]

## Sheet: Sheet1
	Appendix 7
	Sampling Units (identifier)	1. Epifaunal Substrate/ Available Cover (ES)	2. Embeddedness (E)	3.Velocity/ Depth Regimes (V-D)	4. Sediment Deposition (SD)	5. Channel Flow Status (CFS)	6. Channel Alteration (CA)	7. Frequency of Riffles /Channel Sinuosity (FR)	8. Bank Stability (score each bank)(BS)	9. Bank Vegetative Protection (score each bank)(BVP)	10. Riparian Vegetative Zone Width (score each bank riparian zone)(RVZW)	Visual-Based Habitat Assessment Scores	Habitat Quality categories
Localities (SU)	SU ID	ES	E	V-D	SD	CFS	CA	FR	BS	BVP	RVZW	VBHAS
El Triunfo	1	20	20	20	20	20	19	20	20	20	20	199	Optimun
Independencia	2	14	20	10	12	13	20	15	11	14	14	143	Sub-optimun
Teziutlán	3	3	6	8	8	15	11	7	10	14	10	92	Marginal
Unión Hermosillo	4	20	18	17	15	15	18	14	20	20	18	175	Sub-optimun
El Recuerdo	5	20	20	20	15	19	18	19	14	16	13	174	Optimun
Zapote Mocho	6	20	20	20	20	17	20	20	20	19	19	195	Optimun
Las Palmas	7	2	3	1	3	6	8	10	9	6	3	51	Poor
Tolimán dos	8	16	20	13	20	20	20	19	10	7	5	150	Sub-optimun
Tolimán uno	9	20	20	19	20	19	20	19	13	13	5	168	Optimun
Nueva Tenochtitlán	10	20	20	20	20	20	15	20	18	18	18	189	Optimun
El Arenal	11	3	7	2	2	5	6	5	6	6	4	46	Poor
